# Supplementary material
Source: PubMed Central journal article supplement (PMC3499728)
Supplement: npp2012143x1.pdf [file npp2012143x1.pdf]

## **Supplemental Materials, Luijten et al. Dopamine and attentional bias related brain activation**

### *Medical screening*

All participants were screened by a Psychiatrist. The screening included a check for contraindications for haloperidol (lifetime prevalence of epileptic seizure, heart disease and first degree relatives with diseases affecting dopaminergic transmission such as Parkinson disease, Huntington disease or psychosis). Participants were also provided with information on potential side effects such as drowsiness and muscle stiffness and were explained that these side effects are not expected to occur with a single low dose of 2 mg haloperidol. In addition, participants were screened for neurological and psychiatric diseases to make sure that participants had no lifetime neurological or psychiatric diagnoses and that they did not use any medication that crosses the blood brain barrier.

### *Additional imaging analyses*

The four task conditions of the attentional bias line counting task (line-counting smoke picture: LCSP; line-counting neutral picture: LCNP; picture-naming smoke picture: PNSP; picture-naming neutral picture: PNNP) are associated with four contrasts to be defined for second level analyses (Luijten et al., 2011). Results for the main contrast reflecting brain activation associated with attentional bias are reported in the main text. The second contrast in the ABLC task reflects cue-exposure corrected attention (LCSP minus PNSP). This contrast reflects attention to the smoking-related pictures during line counting while correcting for differences between smokers and controls in smoking cue-reactivity such as arousal and familiarity for smoking cues. The third contrast (PNSP minus PNNP) reflects overall cue-reactivity effects for smoking pictures. Finally, the fourth contrast (overall cognitive effort) reflects brain activation associated with overall cognitive effort during line counting irrespective of picture content (LCSP and LCNP relative to baseline contrast). This contrast is defined in order to show whether the task robustly elicits brain activation and to investigate main effects of group and medication for overall task performance regardless of picture type.

### *Attentional bias (LCSP minus LCNP)*

In addition to the analyses described in the main manuscript, we here report main effects (i.e., one-sample t-tests) per group per medication condition for the attentional bias contrast. Main effects were not limited to regions showing a Group x Medication interaction. The same ROIs were used for

these analyses as in the main text and included the bilateral ACC, SPL, superior temporal gyrus, DLPFC, IFG, amygdala, insula and nucleus accumbens. ROIs were defined using the automatic anatomical labeling (AAL) atlas (Tzourio-Mazoyer, *et al* 2002). As the nucleus accumbens is not included in the AAL atlas, a 10 mm sphere with MNI coordinates  $\pm 10\ 12\ -2$  was created as a ROI for the nucleus accumbens (Knutson, *et al* 2008). Results were thresholded at  $p < 0.05$ , Family Wise Error (FWE) corrected for multiple comparisons across the search volume (Small volume correction: Friston, *et al* 1996; Worsley, *et al* 1996). In order to do so, analyses were first thresholded at  $p < 0.001$  uncorrected with 20 contingently activated voxels ( $160\text{mm}^3$ ), and then corrected using a small volume correction ( $p < 0.05$  FWE corrected) in which the search volume was defined by the AAL template corresponding to the *a-priori* defined ROI.

### *Cue-exposure corrected attention (LCSP minus PNSP) and cue-reactivity (PNSP minus PNNP)*

The same analyses were applied to these contrasts as to the attentional bias contrast described in the main text and supplementary materials. Shortly, for both contrasts a random effects Group x Medication RM-ANOVA was performed to investigate Group x Medication interactions. Planned between group and between medication *t*-tests were performed (i.e., differences between groups for placebo and haloperidol separately and medication effects in smokers and non-smoking controls separately), masked by voxels showing a Group x Medication interaction in the RM-ANOVA ( $p < 0.01$  uncorrected). In order to replicate the main findings from our previous study results for the between group two sample *t*-test for placebo will also be reported without masking for the interaction effect. Furthermore, main effects (one-sample *t*-tests) per group per medication condition for both contrasts were calculated. Main effects were not limited to regions showing a Group x Medication interaction. The same ROIs and methods to correct for multiple analyses were used as for the attentional bias contrast.

### *Overall cognitive effort (LCSP and LCNP relative to baseline)*

The first aim of the overall cognitive effort contrast was to show that the ABLT task robustly elicited brain activation during the line counting condition. For this aim a one sample *t*-test across groups was performed for the overall cognitive effort contrast after placebo ( $p < 0.05$  whole brain FWE corrected). A second aim was to investigate whether smokers and non-smoking controls differed regarding brain activation associated with overall cognitive effort (i.e., line counting regardless of picture type). Therefore, a two-sample *t*-test (smokers versus non-smoking controls) for the overall

cognitive effort contrast was performed collapsed across medication conditions. Finally, the overall effects of haloperidol on brain activation associated with overall cognitive effort was investigated using a paired *t*-test (placebo versus haloperidol) collapsed across smokers and non-smoking controls. Between group and between medication analyses were performed in the above mentioned *a-priori* defined ROIs using small volume corrections.

## Additional imaging results

### *Attentional bias*

Main effects per group per medication condition show attentional bias related brain activation in smokers after placebo in the left SPL and right IFG. No attentional bias related brain activation was found in smokers after haloperidol. Non-smoking controls activated the left DLPFC after haloperidol. See supplementary table 1 for details.

**Supplementary Table 1** Brain activation associated with attentional bias for smokers and non-smoking controls during placebo and haloperidol

| Placebo         | MNI coordinates |     |    |                      |                 | Haloperidol     | MNI coordinates |    |    |                      |                 |
|-----------------|-----------------|-----|----|----------------------|-----------------|-----------------|-----------------|----|----|----------------------|-----------------|
|                 | X               | Y   | Z  | Z-value <sup>a</sup> | mm <sup>3</sup> |                 | X               | Y  | Z  | Z-value <sup>a</sup> | mm <sup>3</sup> |
| <i>Smokers</i>  |                 |     |    |                      |                 | <i>Smokers</i>  |                 |    |    |                      |                 |
| left SPL        | -28             | -58 | 54 | 3.94                 | 1208            | ---             |                 |    |    |                      |                 |
| right IFG       | 42              | 42  | -2 | 3.74                 | 328             |                 |                 |    |    |                      |                 |
| <i>Controls</i> |                 |     |    |                      |                 | <i>Controls</i> |                 |    |    |                      |                 |
| ---             |                 |     |    |                      |                 | left DLPFC      | -16             | 56 | 10 | 4.10                 | 264             |

*Note supplementary table 1* Active regions in this table reflects brain activation associated with attentional bias (contrast line counting smoking pictures minus line counting neutral pictures). <sup>a</sup>  $p < 0.05$  FWE small volume corrected

SPL: superior parietal lobe; IFG: inferior frontal gyrus; DLPFC: dorsolateral prefrontal cortex.

### *Cue-exposure corrected attention*

After placebo smokers showed reduced activation for cue-exposure corrected attention relative to non-smoking controls in the bilateral ventral zone of the ACC and the bilateral nucleus accumbens (see supplementary table 2 for details). These group differences after placebo were not found after

masking with the Group x Medication effect. No group differences were observed after haloperidol. Main effects show extended activation in prefrontal, insular, parietal and temporal regions in both smokers and non-smoking controls after placebo. After haloperidol, activation in smokers was largely reduced whereas non-smoking controls still showed extended activation patterns. See supplementary table 3 for a complete overview and details of the main effects for the cue-exposure corrected attention contrast. No significant effects of medication type were found in either smokers or non-smoking controls.

**Supplementary Table 2** Group effects for brain activation associated with cue-exposure corrected attention

|                              | MNI coordinates |    |    | Z-value <sup>a</sup> | mm <sup>3</sup> |
|------------------------------|-----------------|----|----|----------------------|-----------------|
|                              | X               | Y  | Z  |                      |                 |
| <i>Smokers &gt; Controls</i> |                 |    |    |                      |                 |
|                              | ---             |    |    |                      |                 |
| <i>Smokers &lt; Controls</i> |                 |    |    |                      |                 |
| left vACC                    | -10             | 44 | 4  | 3.95                 | 1256            |
| right ACC                    | 14              | 32 | 16 | 3.66                 | 264             |
| left NACC                    | -10             | 12 | 8  | 3.68                 | 496             |
| right NACC                   | 6               | 14 | -2 | 4.52                 | 520             |

*Note supplementary table 2* Group differences in this table reflect differences in brain activation associated with cue-corrected attention (contrast line counting smoking pictures minus picture naming smoking picture). <sup>a</sup>  $p < 0.05$  FWE small volume corrected; (v)ACC: (ventral) anterior cingulate cortex; NACC: nucleus accumbens.

**Supplementary Table 3** Brain activation associated with cue-exposure corrected attention in smokers and non-smoking controls for placebo and haloperidol

| Placebo         | MNI coordinates |     |    |                      |                 | Haloperidol     | MNI coordinates |     |    |                      |                 |
|-----------------|-----------------|-----|----|----------------------|-----------------|-----------------|-----------------|-----|----|----------------------|-----------------|
|                 | X               | Y   | Z  | Z-value <sup>a</sup> | mm <sup>3</sup> |                 | X               | Y   | Z  | Z-value <sup>a</sup> | mm <sup>3</sup> |
| <i>Smokers</i>  |                 |     |    |                      |                 | <i>Smokers</i>  |                 |     |    |                      |                 |
| left SPL        | -20             | -58 | 54 | 4.48                 | 1768            | right SPL       | 16              | -66 | 54 | 4.48                 | 1320            |
| left SPL        | -36             | -42 | 56 | 4.35                 | 192             | left DLPFC      | -22             | -8  | 58 | 4.12                 | 664             |
| right SPL       | 20              | -62 | 56 | 5.06                 | 3624            |                 |                 |     |    |                      |                 |
| left STG        | -48             | 0   | -6 | 4.72                 | 3544            |                 |                 |     |    |                      |                 |
| left DLPFC      | -24             | -8  | 50 | 6.75                 | 1984            |                 |                 |     |    |                      |                 |
| right DLPFC     | 28              | -2  | 52 | 5.96                 | 3784            |                 |                 |     |    |                      |                 |
| left insula     | -38             | -16 | 2  | 4.51                 | 4608            |                 |                 |     |    |                      |                 |
| right insula    | 34              | -14 | 8  | 4.07                 | 1016            |                 |                 |     |    |                      |                 |
| <i>Controls</i> |                 |     |    |                      |                 | <i>Controls</i> |                 |     |    |                      |                 |
| left ACC        | -8              | -24 | 34 | 3.98                 | 344             | left ACC        | -10             | -30 | 34 | 3.89                 | 248             |
| right ACC       | 12              | -32 | 40 | 3.78                 | 712             | left ACC        | -10             | -10 | 36 | 3.59                 | 232             |
| left SPL        | -20             | -54 | 52 | 5.81                 | 4496            | left SPL        | -24             | -52 | 58 | 5.99                 | 4736            |
| right SPL       | 18              | -64 | 58 | 6.32                 | 5440            | right SPL       | 26              | -52 | 60 | 6.86                 | 5568            |
| left STG        | -52             | -36 | 14 | 3.93                 | 1136            | left STG        | -46             | -22 | 4  | 4.18                 | 5712            |
| left STG        | -48             | -18 | 6  | 3.63                 | 424             | right STG       | 52              | 0   | -6 | 4.14                 | 1504            |
| left DLPFC      | -24             | -6  | 52 | 5.57                 | 3152            | left DLPFC      | -22             | -10 | 60 | 5.59                 | 4256            |
| right DLPFC     | 28              | -2  | 52 | 5.40                 | 4912            | right DLPFC     | 32              | -6  | 66 | 5.62                 | 5112            |
| right IFG       | 44              | 4   | 22 | 4.48                 | 712             | left IFG        | -40             | 0   | 24 | 3.79                 | 400             |
| right insula    | 42              | 2   | 10 | 3.54                 | 208             | right IFG       | 42              | 4   | 24 | 3.71                 | 424             |
| right insula    | 34              | -4  | 8  | 3.50                 | 256             | left insula     | -34             | -6  | 12 | 3.96                 | 952             |
| left NACC       | -12             | 10  | 6  | 3.53                 | 176             | right insula    | 50              | 4   | -6 | 4.20                 | 640             |
|                 |                 |     |    |                      |                 | right insula    | 38              | -16 | 14 | 3.76                 | 736             |
|                 |                 |     |    |                      |                 | right insula    | 38              | -2  | 8  | 3.56                 | 168             |

*Note supplementary table 3* Active regions in this table reflects brain activation associated with cue-exposure corrected attention (contrast line counting smoking pictures minus picture naming smoking pictures).<sup>a</sup>  $p < 0.05$  FWE small volume corrected. SPL: superior parietal lobe; STG: superior temporal gyrus; DLPFC: dorsolateral prefrontal gyrus; ACC: anterior cingulate cortex; IFG: inferior frontal gyrus; NACC: nucleus accumbens.

### *Cue-reactivity*

No significant group differences were found regarding cue reactivity related brain activation after placebo or haloperidol. Main effects per group per medication condition showed that smokers and non-smokers had similar cue-reactivity responses after placebo in the insula and STG. Only the ventral ACC was uniquely activated in smokers after placebo. Cue-reactivity related brain activation in the ventral ACC in smokers was not found after haloperidol. See supplementary table 4 for main effects of cue-reactivity related brain activation. No significant medication effects were found in either smokers or non-smoking controls.

**Supplementary Table 4** Brain activation associated with cue-reactivity for smokers and non-smoking controls during placebo and haloperidol

| Placebo         | MNI coordinates |     |    |                      |                 | Haloperidol     | MNI coordinates |     |    |                      |                 |
|-----------------|-----------------|-----|----|----------------------|-----------------|-----------------|-----------------|-----|----|----------------------|-----------------|
|                 | X               | Y   | Z  | Z-value <sup>a</sup> | mm <sup>3</sup> |                 | X               | Y   | Z  | Z-value <sup>a</sup> | mm <sup>3</sup> |
| <i>Smokers</i>  |                 |     |    |                      |                 | <i>Smokers</i>  |                 |     |    |                      |                 |
| left vACC       | 0               | 38  | -2 | 3.66                 | 264             | left insula     | -38             | -20 | 14 | 4.22                 | 392             |
| right vACC      | 6               | 40  | -2 | 3.71                 | 456             |                 |                 |     |    |                      |                 |
| left insula     | -36             | -18 | 14 | 4.84                 | 760             |                 |                 |     |    |                      |                 |
| left STG        | -52             | -20 | 12 | 4.59                 | 536             |                 |                 |     |    |                      |                 |
| <i>Controls</i> |                 |     |    |                      |                 | <i>Controls</i> |                 |     |    |                      |                 |
| left insula     | -34             | -18 | 8  | 5.79                 | 1720            | left insula     | -36             | -20 | 18 | 4.17                 | 616             |
| left STG        | -62             | -26 | 16 | 4.37                 | 1128            |                 |                 |     |    |                      |                 |

*Note supplementary table 4* Active regions in this table reflects brain activation associated with cue reactivity (contrast picture naming smoking pictures minus picture naming neutral pictures).<sup>a</sup>  $p < 0.05$  FWE small volume corrected. vACC: ventral anterior cingulate cortex; STG: superior temporal gyrus.

### *Overall cognitive effort*

During placebo overall cognitive effort across groups was associated with robust brain activation in bilateral occipital, inferior and superior parietal, and dorsolateral prefrontal brain regions, as well as in motor areas, the insula, the ACC and subcortical regions including the thalamus and caudate ( $p < 0.05$  FWE corrected; see supplementary figure 1). In addition, haloperidol reduced brain activation in the right medial prefrontal cortex and bilateral DLPFC (see supplementary table 5 for details). None of the brain regions showed increased activation after haloperidol. Brain activation associated with overall cognitive effort did not differ between smokers and non-smoking controls.

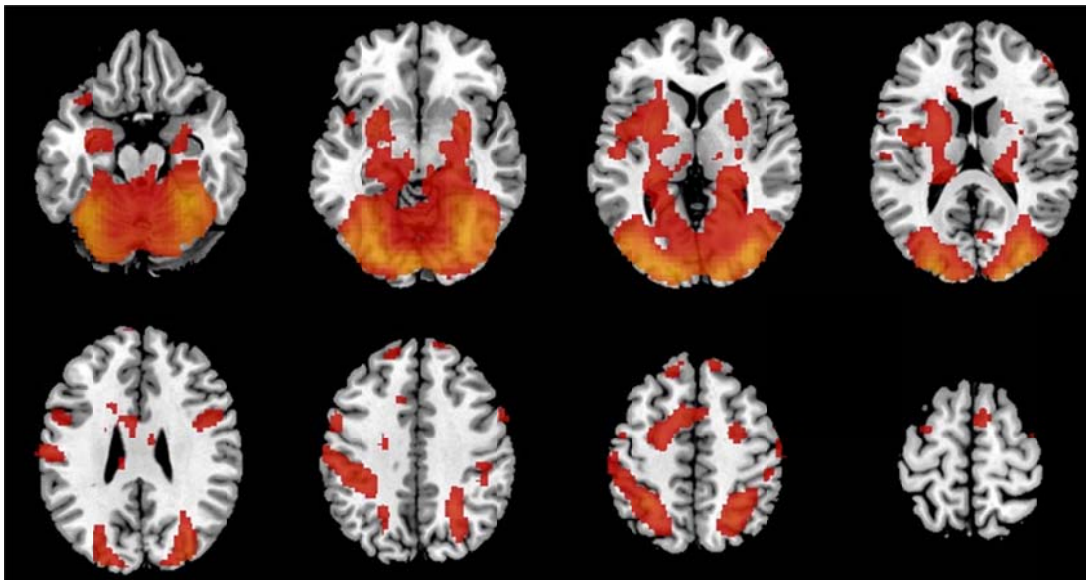

**Supplementary Figure 1** Brain activation associated with overall cognitive effort after placebo across smokers and non-smoking controls

*Note supplementary figure 1*  $p < 0.05$  FWE corrected (whole brain).

**Supplementary Table 5** Medication effects for brain activation associated with overall cognitive effort

|                                 | MNI coordinates |    |    | Z-value <sup>a</sup> | mm <sup>3</sup> |
|---------------------------------|-----------------|----|----|----------------------|-----------------|
|                                 | X               | Y  | Z  |                      |                 |
| <i>Haloperidol &lt; Placebo</i> |                 |    |    |                      |                 |
| right medial PFC                | 8               | 38 | 34 | 3.74                 | 160             |
| left DLPFC                      | -20             | 34 | 30 | 4.25                 | 3632            |
| right DLPFC                     | 20              | 52 | 34 | 3.81                 | 848             |
| <i>Haloperidol &gt; Placebo</i> |                 |    |    |                      |                 |
| ---                             |                 |    |    |                      |                 |

Note supplementary table 5 Medication effects in this table reflect differences in brain activation associated with overall cognitive effort (contrast line counting smoking pictures and line counting neutral pictures versus baseline). <sup>a</sup>  $p < 0.05$  FWE small volume corrected. PFC: prefrontal cortex; DLPFC: dorsolateral prefrontal cortex.

### *Withdrawal*

Smokers were not allowed to smoke after taking the medication, which was four hours before scanning and could have introduced withdrawal. Withdrawal was assessed using the withdrawal subscale of the Questionnaire of Smoking Urges (Cox, *et al* 2001). Withdrawal scores in smokers were analyzed with Medication as a single within subject factor. Results showed that medication type did not influence withdrawal scores  $F(1,23) = 0.65$ ,  $p = 0.8$ . As individual differences in withdrawal may influence cognitive performance we correlated withdrawal scores with line counting accuracy and reaction times per medication condition. No significant correlations were found, all  $p$ 's  $> 0.14$  suggesting that individual differences in withdrawal in smokers were not associated with cognitive performance. However, given the current study design it cannot be completely ruled out that withdrawal may have influenced cognitive performance.

### *Lifetime substance use*

Supplementary table 6 shows lifetime substance use for smokers and non-smoking controls. Although groups do not differ significantly on any of the substances of abuse, it seems that smokers have used cannabis more often than non-smoking controls. More specifically, two smokers were identified as outliers as they have used cannabis more than 150 times lifetime. Although it is



theoretically unlikely that cannabis use would have an impact on nicotine-related attentional bias (i.e., attentional biases are known to be substance-specific), we conducted an additional analyses excluding the two smokers who have used cannabis more than 150 times lifetime for brain and behavioral indices of attentional bias. These analyses were exactly similar to the analyses described in the paper. Removing these two subjects did not change results substantially. Two minor differences were noticed. First, the  $p$ -value for the main effect of Picture for reaction times increased from  $p= 0.048$  to  $p= 0.06$ . Second, although activation levels were still significant at the  $p < 0.05$  FWE corrected level, the volume of increased brain activation in smokers after placebo in the dACC decreased from  $176 \text{ mm}^3$  to  $40 \text{ mm}^3$  when masked for the Group x Medication interaction. These minor differences are most likely the result of reduced statistical power.

**Supplementary Table 6** Lifetime occasions of drug use for smokers and non-smoking controls

| Substance             | Smokers |           | Controls |           |
|-----------------------|---------|-----------|----------|-----------|
|                       | Mean    | <i>SD</i> | Mean     | <i>SD</i> |
| Cannabis              | 205.67  | 717.74    | 1.54     | 1.69      |
| Cocaine               | 1.32    | 5.99      | 0.04     | 0.20      |
| Amphetamines          | 1.12    | 3.53      | 0.04     | 0.20      |
| Ecstasy               | 3.28    | 8.36      | 0.21     | 1.02      |
| Opiates               | -       | -         | -        | -         |
| Alcohol <sup>ab</sup> | 17.63   | 3.47      | 12.84    | 3.34      |

*Note supplementary table 6*<sup>a</sup> Sum scores representing quantity and frequency of alcohol consumption measured utilizing the Quantity-Frequency-Variability Index (QFV-index: Lemmens, *et al* 1992). In this questionnaire three items are employed in order to determine the drinking quantity (number of glasses), frequency (drinking days), and variability (binge drinking) during the last six months.<sup>b</sup> Significant group difference  $p < 0.001$ , *SD*: Standard deviation.

**Supplementary Table 7** Correlations between cue induced craving in smokers and behavioral and brain indices of attentional bias

| Cue induced craving | Placebo ( $\rho$ ) | Haloperidol ( $\rho$ ) |
|---------------------|--------------------|------------------------|
| Reaction times      | -.03               | .01                    |
| Accuracy            | -.16               | .07                    |
| dACC                | -.11               | .16                    |
| Right DLPFC         | -.01               | .20                    |
| Left SPL            | -.26               | .05                    |

*Note supplementary table 7*  $\rho$  = spearman rank correlation coefficients for cue induced craving during performance of the attentional bias line counting task and behavioral and brain indices. None of the correlations are significant. Behavioral and brain indices are based on the contrast line counting smoking pictures minus line counting neutral pictures. Brain indices reflect those regions in which group differences were found. dACC: dorsal anterior cingulate gyrus; DLPFC: dorsolateral prefrontal cortex; SPL: superior parietal lobe.

**Supplementary Table 8** Correlations between behavioral measures and brain activation

|             | Placebo ( $\rho$ ) |          | Haloperidol ( $\rho$ ) |          |
|-------------|--------------------|----------|------------------------|----------|
|             | Reaction times     | Accuracy | Reaction times         | Accuracy |
| dACC        | -.12               | .04      | .24                    | .06      |
| Right DLPFC | -.28               | -.27     | .21                    | .19      |
| Left SPL    | -.22               | -0.10    | .07                    | .03      |

*Note supplementary table 8*  $\rho$  = spearman rank correlation coefficients for behavioral measures and brain activation. None of the correlations are significant. Behavioral and brain indices are based on the contrast line counting smoking pictures minus line counting neutral pictures. Brain indices reflect those regions in which group differences were found. dACC: dorsal anterior cingulate gyrus; DLPFC: dorsolateral prefrontal cortex; SPL: superior parietal lobe.

## References

Cox LS, Tiffany ST, Christen AG (2001). Evaluation of the brief questionnaire of smoking urges (QSU-brief) in laboratory and clinical settings. *Nicotine Tob Res* **3**: 7-16.

Friston KJ, Holmes A, Poline JB, Price CJ, Frith CD (1996). Detecting activations in PET and fMRI: levels of inference and power. *Neuroimage* **4**: 223-235.

Knutson B, Wimmer GE, Rick S, Hollon NG, Prelec D, Loewenstein G (2008). Neural antecedents of the endowment effect. *Neuron* **58**: 814-822.

Lemmens P, Tan ES, Knibbe RA (1992). Measuring quantity and frequency of drinking in a general population survey: a comparison of five indices. *J Stud Alcohol* **53**: 476-486.

Tzourio-Mazoyer N, Landeau B, Papathanassiou D, Crivello F, Etard O, Delcroix N, Mazoyer B, Joliot M (2002). Automated anatomical labeling of activations in SPM using a macroscopic anatomical parcellation of the MNI MRI single-subject brain. *Neuroimage* **15**: 273-289.

Worsley KJ, Marrett S, Neelin P, Vandal AC, Friston KJ, Evans AC (1996). A unified statistical approach for determining significant signals in images of cerebral activation. *Hum Brain Mapp* **4**: 58-73.
